# Supplementary material
Source: PubMed Central journal article supplement (PMC7179582)
Supplement: AAC.02502-19-s0001.pdf [file AAC.02502-19-s0001.pdf]

1 **Supplementary Information**

2 **Table S1** Primers used in this study.

| Primer              | Nucleotide sequence (5' to 3')                              | Size (bp) | Reference               |
|---------------------|-------------------------------------------------------------|-----------|-------------------------|
| <i>tet(X)-EcoRI</i> | TACGCG <u>AATTC</u> ATGACTTTACTAAAACATAAAAAAATTACAATAATTGGT | 1137      | This study <sup>a</sup> |
| <i>tet(X)-SalI</i>  | TACGCG <u>TCGACTT</u> TATAGATTCATTAGTTTTTGGAAAGAAAAGTCG     |           |                         |
| hp2-F               | GCTGACCTGTATCACAAAAC                                        | 5117      | This study              |
| tnpF-R              | GCAAACCTGCCGAATAAATA                                        |           |                         |
| P1-F1               | ACCCTTTCAGCGATAAACTT                                        | 11770     | This study              |
| P1-F2               | ATTTGAGTATGCCCAAAGGA                                        |           |                         |

3 <sup>a</sup>Restriction sites of *EcoRI* and *SalI* enzymes are underlined.

4

5

6

7

8

9

10

11 **Table S2** MICs of tigecycline and meropenem for the studied strains.

| Strains                                           | Sources              | MIC (mg/L) |      |
|---------------------------------------------------|----------------------|------------|------|
|                                                   |                      | TGC        | MEM  |
| <i>E. coli</i> JM109+pBAD24                       | Empty vector         | 0.25       | 0.03 |
| <i>E. coli</i> JM109+pBAD24- <i>tet(X)</i> -novel | <i>tet(X)</i> clone  | 8          | 0.03 |
| <i>A. baylyi</i> ADP1                             | Laboratory strain    | 0.06       | 0.13 |
| <i>A. indicus</i> MMS9-2                          | Soil                 | 8          | 32   |
| <i>A. baylyi</i> ADP1+MMS9-2- <i>tet(X)</i>       | Natural transformant | 8          | 0.13 |
| <i>A. indicus</i> MM112-2                         | Duck                 | 16         | 16   |
| <i>A. baylyi</i> ADP1+MM112-2- <i>tet(X)</i>      | Natural transformant | 8          | 0.13 |
| <i>A. indicus</i> B18                             | Pigeon               | 16         | 0.25 |
| <i>A. baylyi</i> ADP1+B18- <i>tet(X)</i>          | Transconjugant       | 8          | 0.13 |
| <i>A. variabilis</i> DJ1-1                        | Chicken              | 16         | 0.13 |
| <i>A. baylyi</i> ADP1+ DJ1-1- <i>tet(X)</i>       | Transconjugant       | 8          | 0.13 |

12

13 TGC, tigecycline; MEM, meropenem

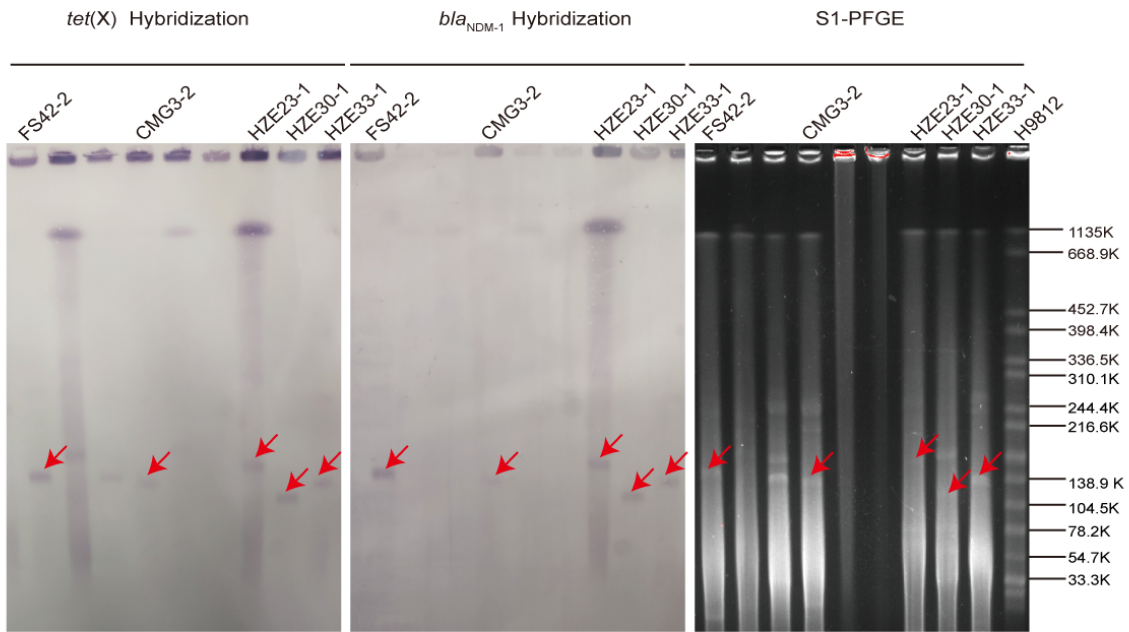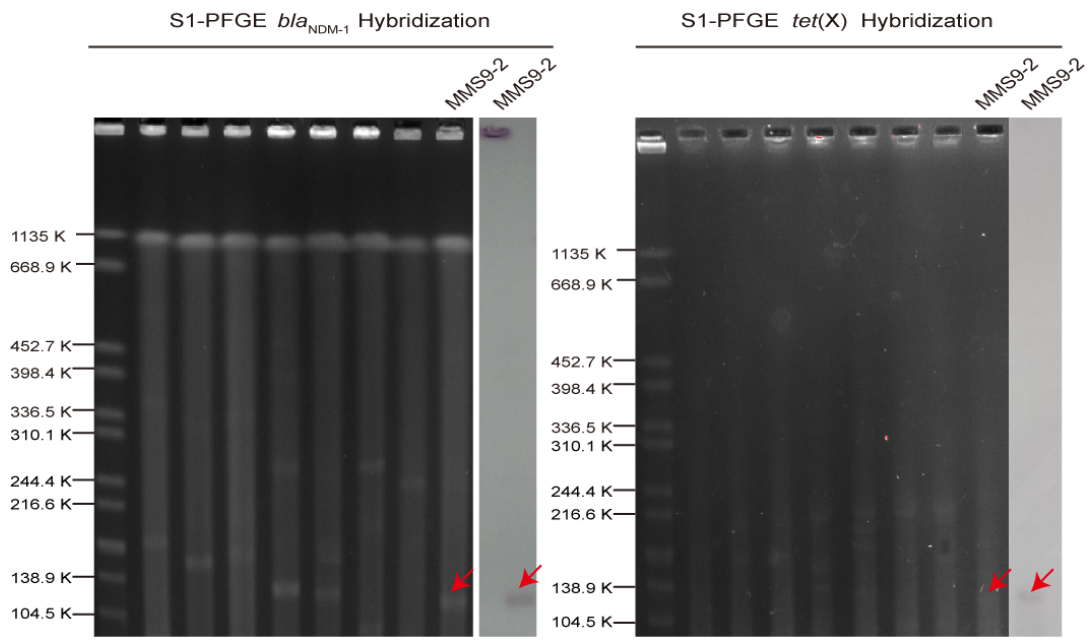

14  
15  
16  
17  
18

**Fig. S1** Localization of six plasmids that co-haboring *tet(X)* and *bla*<sub>NDM-1</sub> by S1-PFGE and Southern blot hybridization.
